# Supplementary material for: Structural Extremes in a Cretaceous Dinosaur
Source: PLOS journal article supplement (doi:10.1371/journal.pone.0001230), 2007-11-15
Supplement: S7 (10.1371/journal.pone.0001230.s007) [file journal.pone.0001230.s007]

## TEXT S1: GEOLOGIC SETTING

### El Rhaz Formation

The bones of *Nigersaurus taqueti* were found in the El Rhaz Formation of the Tegama Group, which consists of a thick sequence of coarse-to-medium grained, cross-bedded sandstones almost devoid of finer-grained horizons [1,2] (Figure 1S). The beds are considered to be Aptian-to-Albian in age, and the localities in the Ténéré Desert (dubbed “Gadoufaoua”) were a considerable distance from deltaic habitats in the region of the Benue Trough (present day Nigeria) (Figure 2S). The aquatic fauna recovered is entirely freshwater.

*Nigersaurus* was one of the most common large herbivores of its day, judging from the number of specimens collected. Its bones are exceeded in number only by the more robust iguanodontian *Lurdusaurus* [3]. Together, these two herbivores shared their riparian habitat with two relatives, an unnamed titanosaur [2] and the iguanodontian *Ouranosaurus* [4], composing one of the few megaherbivore associations (herbivores more than  $10^6$  g) with a balance of sauropods and large ornithopods. Predators would have included the giant crocodylomorph *Sarcosuchus imperator* [5], the spinosaurid *Suchomimus tenerensis* [6], and similar sized basal abelisaurid and carcharodontosaurid theropods [7].

## REFERENCES

1. Taquet P, Russell DA (1999) A massively-constructed iguanodont from Gadoufaoua, Lower Cretaceous of Niger. *Ann Paleontol* 85: 85-96.
2. Sereno PC, Beck AL, Dutheil DB, Larsson HC, Lyon GH et al. (1999) Cretaceous

sauropods from the Sahara and the uneven rate of skeletal evolution among dinosaurs. *Science* 286: 1342-1347.

3. Taquet P, Russell DA (1999) A massively-constructed iguanodont from Gadoufaoua, Lower Cretaceous of Niger. *Ann Paleontol* 85: 85-96.
4. Taquet P (1976) Géologie et paléontologie du gisement de Gadoufaoua (Aptian du Niger). *Cah Paléontol* 1976: 1-191.
5. Sereno PC, Larsson HCE, Sidor CA, Gado B (2001) The giant crocodyliform *Sarcosuchus* from the Cretaceous of Africa. *Science* 294: 1516-1519.
6. Sereno PC, Beck AL, Dutheil DB, Gado B, Larsson HCE et al. (1998) A long-snouted predatory dinosaur from Africa and the evolution of spinosaurids. *Science* 282: 1298-1302.
7. Sereno PC, Brusatte SL (in press) Basal abelisaurid and carcharodontosaurid theropods from the Elrhaz Formation (Aptian-Albian) of Niger. *Acta Palaeontol Pol.*
