# Supplementary figures and images for: Structural Extremes in a Cretaceous Dinosaur
Source: PLOS journal article supplement (doi:10.1371/journal.pone.0001230), 2007-11-15

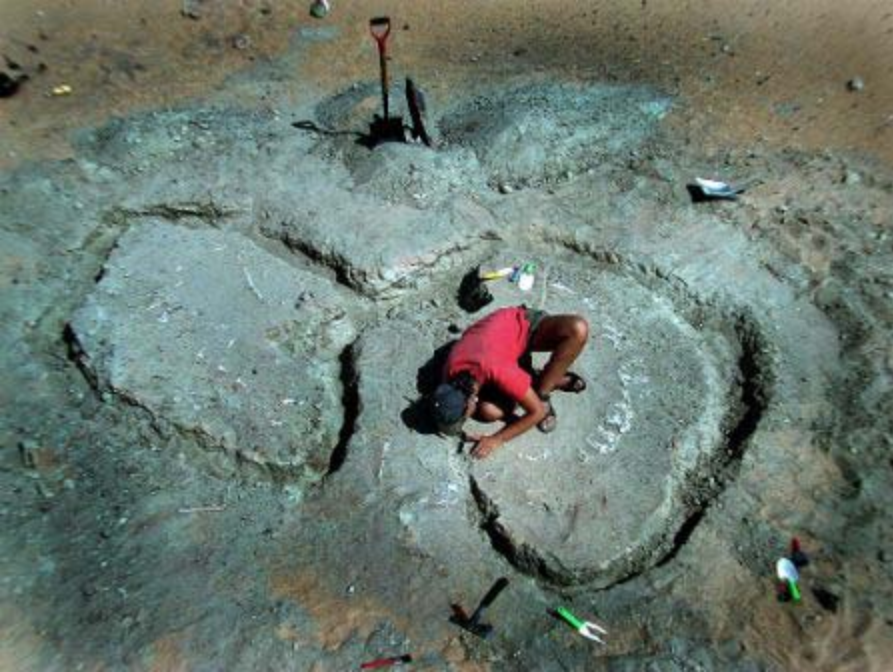

# Gobero Niger, Africa

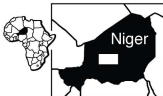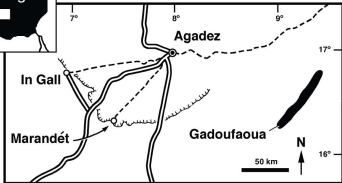

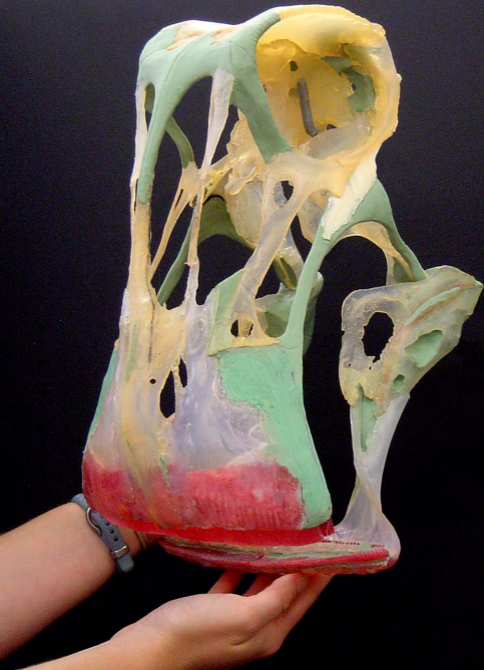

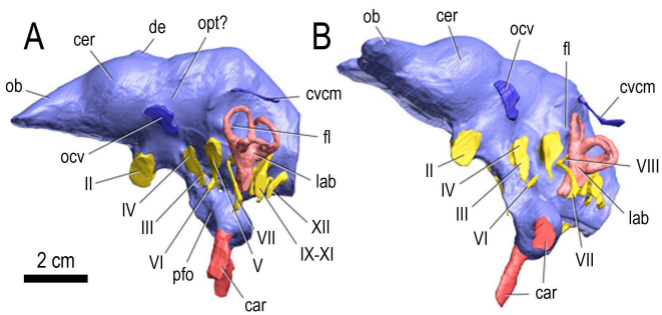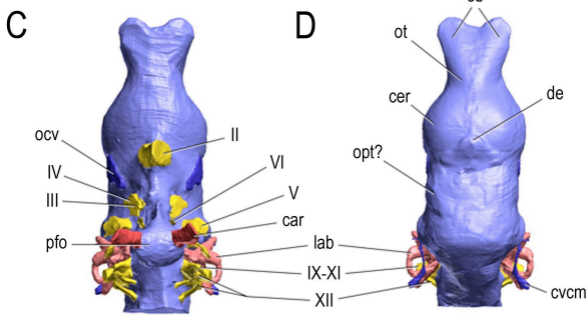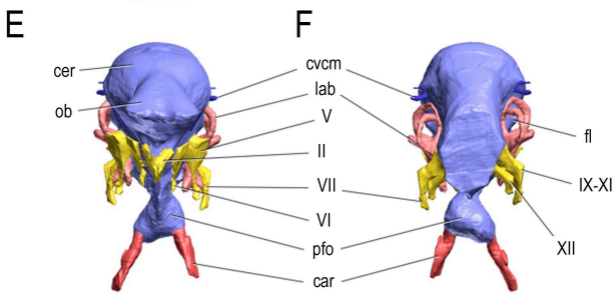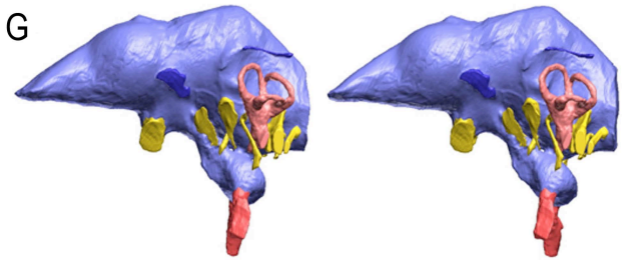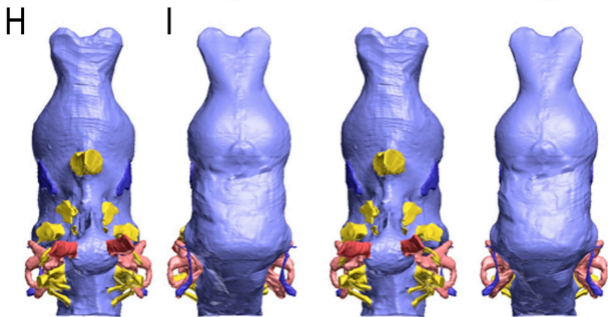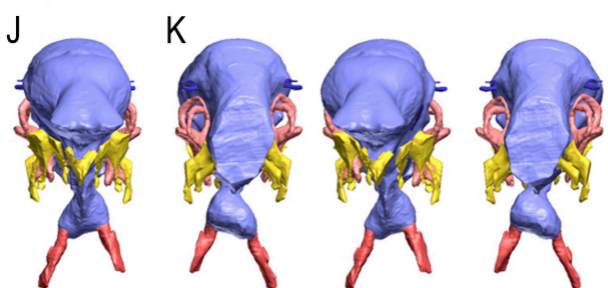

**A**

1 cm

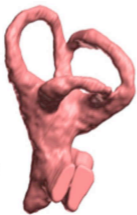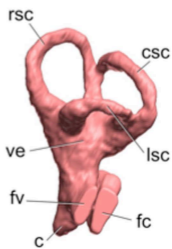**B**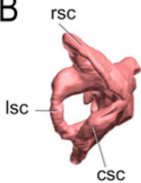**C**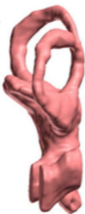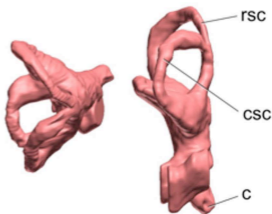**D**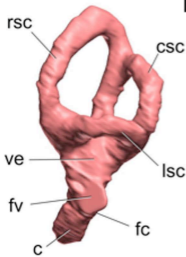**E**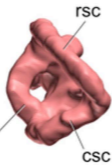**F**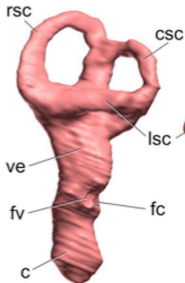**G**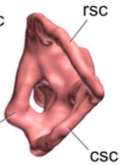

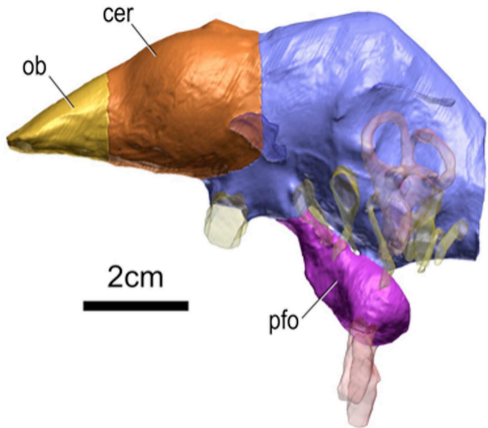

Supplement: S1 (10.1371/journal.pone.0001230.s001) [file Nigersaurus_figs_journal.pone.0001230.s001-s006.pdf]
